# Supplementary material
Source: PubMed Central journal article supplement (PMC10867785)
Supplement: NIHMS1963597-supplement-Supplementary_Figures.pdf [file NIHMS1963597-supplement-Supplementary_Figures.pdf]

# **Supplementary Information**

Ghosh et al



**Supplementary Figure 1: UroA protects against iAs<sup>3+</sup>- induced apoptosis in colon epithelial cells.** Flow cytometry dot plot representation of apoptosis after T84 cells were treated with iAs<sup>3+</sup> (0, 1, 5, 10, 50, 100 μM) in presence of vehicle (DMSO-0.01%) or UroA (25 μM) for 48 h. Results are representative of three independent experiments.



**Supplementary Figure 2: UroA impairs iAs<sup>3+</sup> induced ROS generation.** T84 cells were treated with iAs<sup>3+</sup> ( 1, 5, 10, 50 µM) in presence of vehicle (DMSO-0.01%) or UroA (25 µM) for 12 h. Representative flow cytometry histograms are showing ROS generation as green fluorescence from DCFDA stained T84 cells. Results are representative of three independent experiments.



**Supplementary Figure 3: iAs<sup>3+</sup> induced dose dependent reduction in GSH/GSSG levels.** T84 cells were treated with different concentration of iAs<sup>3+</sup> (1, 5, 10, 50, 100 μM) for 24 h. The levels of GSH and GSSG were measured and the GSH/GSSG ratio was calculated. Results are representative of three independent experiments. \**p* < 0.05, \*\**p* < 0.01, \*\*\**p* < 0.001, Statistics performed using one-way ANOVA in GraphPad Prism software. Error bar, mean ± SEM (n=4-8)



**Supplementary Figure 4: Dose dependent protection of UroA against iAs<sup>3+</sup> induced barrier permeability.** Monolayer T84 cells on transmembranes were treated with iAs<sup>3+</sup> (20 µM) in presence of UroA ( 0, 5, 10, 25 µM) for 24 h. FITC-dextran was added to these cells (top of the membrane) and incubated for 2 h at 37°C and FITC-dextran levels in the bottom chamber well was measured. \* $p < 0.05$ , \*\* $p < 0.01$ , \*\*\* $p < 0.001$ , Statistics performed using 2way ANOVA in GraphPad Prism software. Error bar, mean  $\pm$  SEM (n=4)



**Supplementary Figure 5: Intracellular levels of arsenic.** T-84 cells (90-95% confluence) in 6-well plate were treated with treated with vehicle (0.05% DMSO) or iAs<sup>3+</sup> (5 μM) or UroA (25 μM) or iAs<sup>3+</sup> (5 μM) + UroA (25 μM) in quadruplicates for 24 h. The cell lysates (n=4 per treatment) were prepared and measured intracellular arsenic using Agilent 7800 ICP-MS instrument. The standard curve was obtained by serial dilution of a commercially available standard stock solution., Statistics performed using 2way ANOVA in GraphPad Prism software. \**p* < 0.05, \*\**p* < 0.01, \*\*\**p* < 0.001. Error bar, mean ± SEM (n=4)
